# Supplementary material for: Phase-contrast MRI at the spinal canal: Range of spinal cord motion and CSF flow, and impact of clinical and anatomical parameters
Source: Research Square preprint supplement (doi:10.21203/rs.3.rs-2367710/v1), 2022-12-17
Supplement: Supplementary file 1 [file 5ad9cd418ae1f8bb91086d80.docx]

|  |  |  | Number of artifacts | Number of outlier (</>99%) | Test-test ICC  (peak-tp-peak amplitude / total displacement) | Test-retest ICC (peak-tp-peak amplitude / total displacement) |
| --- | --- | --- | --- | --- | --- | --- |
| Sagittal phase-contrast MRI | spinal cord motion | C2/C3 | 5 | 1 | 0.987 / 0.986 | 0.920 / 0.688 |
| C3/C4 | 5 | 2 | 0.999 / 0.993 | 0.884 / 0.893 |
| C5/C6 | 5 | 2 | 0.998 / 0.994 | 0.908 / 0.963 |
| C5/C6 | 5 | 2 | 0.998 / 0.993 | 0.902 / 0.863 |
| C6/C7 | 5 | 2 | 0.991 / 0.992 | 0.921 / 0.940 |
| C7/T1 | 7 | 3 | 0.987 / 0.979 | 0.942 / 0.885 |
| Axial phase-contrast MRI | spinal cord motion | C2/C3 | 2 | 1 | 0.966 / 0.924 | 0.967 / 0.966 |
| C5/C6 | 11 | 3 | 0.999 / 0.986 | 0.951 / 0.967 |
| CSF-flow | C2/C3 | 5 | 2 | 0.992 / 0.995 | 0.957 / 0.951 |
| C5/C6 | 12 | 2 | 0.987 / 0.985 | 0.877 / 0.883 |

Supplement 2: number of artifacts, outlier, and reliability Data
