# Supplementary material for: Phase-contrast MRI at the spinal canal: Range of spinal cord motion and CSF flow, and impact of clinical and anatomical parameters
Source: Research Square preprint supplement (doi:10.21203/rs.3.rs-2367710/v1), 2022-12-17
Supplement: Supplementary file 2 [file 9566ce63390293d4eec6345d.docx]

|  | | Supine position | | Elevated leg position | | p |
| --- | --- | --- | --- | --- | --- | --- |
| Spinal cord motion (axial) | | mean ± SD | 95%CI | mean ± SD | 95%CI |  |
| Peak-to-peak amplitude (mm/s) | C2/C3 | 6.0 ± 2.0 | 5.5-6.4 | 6.6 ± 2.7 | 5.9-7.3 | 0.130 |
| C5/C6 | 7.1 ± 2.9 | 6.3-7.9 | 7.04 ± 2.9 | 6.2-7.9 | 0.170 |
| total displacement (mm) | C2/C3 | 0.7 ± 0.2 | 0.7-0.8 | 0.8 ± 0.3 | 0.7-0.9 | 0.423 |
| C5/C6 | 0.9 ± 0.4 | 0.8-1.1 | 1.0 ± 0.4 | 0.9-1.1 | 0.141 |
| CSF-flow | |  |  |  |  |  |
| Peak-to-peak amplitude (mm/s) | C2/C3 | 45 ± 11 | 43-47 | 48 ± 12 | 45-51 | <0.001 |
| C5/C6 | 73 ± 25 | 67-81 | 73 ± 24 | 66-80 | 0.538 |
| Total displacement (mm) | C2/C3 | 11 ± 3 | 10-12 | 12 ± 3 | 11-13 | <0.001 |
| C5/C6 | 18 ± 6 | 16-20 | 19 ± 6 | 17-20 | 0.184 |

Supplement 3 – spinal cord motion and CSF flow in supine and in elevated leg position
