# Supplementary material for: Phase-contrast MRI at the spinal canal: Range of spinal cord motion and CSF flow, and impact of clinical and anatomical parameters
Source: Research Square preprint supplement (doi:10.21203/rs.3.rs-2367710/v1), 2022-12-17
Supplement: Supplementary file 3 [file ab95f79f4acb307d92dd36ca.docx]

Details MRI sequences:

T2-weighted (T2w) 3D sequence in sagittal orientation, cervical spine:

spatial resolution 0.6 mm x 0.6 mm x 1.0 mm, TR 1500 ms, TE 134 ms, Flip angle 105°, GRAPPA factor: 3, acquisition time 3:53 min

axial, 2D phase-contrast sequence CSF:

prospective ECG-triggering, spatial resolution 0.9mm x 0.9mm x 5mm, FoV 200x200 mm2, TR = 20.2 ms, TE = 7.7 ms, flip angle 15°, bandwidth 488 Hz/Pixel, PEAK-GRAPPA acceleration1, velocity encoding parameter 10cm/s, velocity vector in cranio-caudal direction, acquisition time depending on the heart rate ~1.5 minutes

axial, 2D phase-contrast sequence spinal cord:

prospective ECG-triggering, spatial resolution 0.9mm x 0.9mm x 5mm, FoV 200x200 mm2, TR = 20.2 ms, TE = 7.7 ms, flip angle 15°, bandwidth 488 Hz/Pixel, PEAK-GRAPPA acceleration (21), velocity encoding parameter 5 cm/s, velocity vector in cranio-caudal direction, acquisition time depending on the heart rate ~1.5 minutes

sagittal, 2D phase-contrast sequence spinal cord:

prospective ECG-triggering, spatial resolution 1mm x 1mm x 3mm, FoV 200x200 mm2, TR = 31.8 ms, TE = 7.75ms, flip angle 15°, bandwidth 488 Hz/Pixel, v velocity encoding parameter 5 cm/s, PEAK-GRAPPA acceleration1, acquisition time approximately 2 min depending on the heart rate

1Jung B, Ullmann P, Honal M, Bauer S, Hennig J, Markl M: Parallel MRI with extended and averaged GRAPPA kernels (PEAK-GRAPPA): optimized spatiotemporal dynamic imaging. J Magn Reson Imaging 2008, 28(5):1226.
